## 1 **Critical assessment of approaches for molecular docking to elucidate**

## 2 **associations of HLA alleles with Adverse Drug Reactions**

3 Kerry A Ramsbottom<sup>1</sup>, Dan Carr<sup>2</sup>, Andrew R Jones<sup>1</sup> and Daniel J Rigden<sup>1,\*</sup>

4 <sup>1</sup> Institute of Integrative Biology, University of Liverpool, Liverpool UK

5 <sup>2</sup> Institute of Translational Medicine, University of Liverpool, Liverpool UK

6 \* = corresponding author (drigden@liverpool.ac.uk)

### 7 **Abstract**

8 Adverse drug reactions have been linked with genetic polymorphisms in HLA genes in numerous  
9 different studies. HLA proteins have an essential role in the presentation of self and non-self peptides,  
10 as part of the adaptive immune response. Amongst the associated drugs-allele combinations, anti-HIV  
11 drug Abacavir has been shown to be associated with the HLA-B\*57:01 allele, and anti-epilepsy drug  
12 Carbamazepine with B\*15:02, in both cases likely following the altered peptide repertoire model of  
13 interaction. Under this model, the drug binds directly to the antigen presentation region, causing  
14 different self peptides to be presented, which trigger an unwanted immune response. There is growing  
15 interest in searching for evidence supporting this model for other ADRs using bioinformatics  
16 techniques. In this study, *in silico* docking was used to assess the utility and reliability of well-known  
17 docking programs when addressing these challenging HLA-drug situations. Four docking programs:  
18 SwissDock, ROSIE, AutoDock Vina and AutoDockFR, were used to investigate if each software  
19 could accurately dock the Abacavir back into the crystal structure for the protein arising from the  
20 known risk allele, and if they were able to distinguish between the HLA-associated and non-HLA-  
21 associated (control) alleles. The impact of using homology models on the docking performance and  
22 how using different parameters such as including receptor flexibility affected the docking  
23 performance, were also investigated to simulate the approach where a crystal structure for a given  
24 HLA allele may be unavailable. The programs that were best able to predict the binding position of  
25 Abacavir were then used to recreate the docking seen for Carbamazepine with B\*15:02 and controls  
26 alleles.

27 It was found that the programmes investigated were sometimes able to correctly predict the binding  
28 mode of Abacavir with B\*57:01 but not always. Each of the software packages that were assessed  
29 could predict the binding of Abacavir and Carbamazepine within the correct sub-pocket and, with the  
30 exception of ROSIE, was able to correctly distinguish between risk and control alleles. We found that  
31 docking to homology models could produce poorer quality predictions, especially when sequence  
32 differences impact the architecture of predicted binding pockets. Caution must therefore be used as  
33 inaccurate structures may lead to erroneous docking predictions. Incorporating receptor flexibility  
34 was found to negatively affect the docking performance for the examples investigated. Taken  
35 together, our findings help characterise the potential but also the limitations of computational  
36 prediction of drug-HLA interactions. These docking techniques should therefore always be used with  
37 care and alongside other methods of investigation, in order to be able to draw strong conclusions from  
38 the given results.

## 39 **1. Introduction**

40 An adverse drug reaction (ADR) is a harmful or unpleasant reaction, resulting from the use of  
41 medicinal products. Type A reactions are those that are dose-related. Idiosyncratic drug reactions  
42 (IDRs) or Type B hypersensitivity reactions are dose-independent, occurring in some but not all  
43 people [1]. The incidence of ADRs have increased globally from 2.2 million in 1994 to 10 million in  
44 2014 [2]. This is therefore a very important issue which needs to be addressed.

45 These ADRs have been linked with specific Human Leukocyte Antigens (HLA) in numerous studies,  
46 whereby individuals carrying particular alleles of HLA genes are at higher risk of developing adverse  
47 reactions to particular drugs [3-5]. HLA gene products play a key role in the adaptive immune  
48 response, presenting peptides (self and non-self) to a T cell complex to elicit a response when needed.  
49 The HLA system is highly variable, both in individuals and in populations. Individuals carry multiple  
50 HLA genes with similar functions: A, B, C in class I, or DRA, DRB, DQA, DQB and others in class  
51 II. Class I gene products are responsible for presentation of peptides from pathogens internal to cells,  
52 such as viruses. Class II gene products present peptides from extracellular pathogens.

53 HLA alleles are given a unique identifier, following a detailed and well-established nomenclature  
54 system, such as 'HLA-B\*57:01'. The identifier always has the prefix HLA- and then the gene

55 identifier (A, B, C for class I HLA genes, or DRA, DRB, DQA, DQB and others for class II HLA  
56 genes) followed by a “\*” separator and a set of numbers separated into groups. The first two numbers  
57 after the “\*” separator give the allele group, originally defined by serotyping, and the next two  
58 numbers following ‘:’ are unique for the specific HLA protein sequence. Further sets of digits are  
59 possible after additional colon separators i) to identify alleles different at the exon (DNA)-level but  
60 causing no change to the protein sequence (synonymous substitutions), and then ii) for substitutions in  
61 intronic regions e.g. ‘HLA-B\*57:01:01:01’. For consideration of HLA-ADRs, four digit resolution  
62 (i.e. resolved to the protein sequence level only) is generally considered sufficient [6].

63 The role of HLA in ADRs has been hypothesised in three main ways. The *Hapten* model predicts that  
64 the drug binds covalently to a self protein, and is processed via HLA molecules to the presented  
65 peptide; this drug-protein combination then being recognised as being non-self and initiating an  
66 immune response. The *Pharmacological Interaction (PI)* model predicts that the drug binds non-  
67 covalently, directly to the immune receptors; mainly T-cell receptors or HLA. The *Altered Peptide*  
68 *Repertoire* model states that the drug interacts with the HLA molecule directly and non-covalently,  
69 leading to a different self-peptide set being presented, which is recognised as foreign, and thus  
70 eliciting the immune reaction [7]. Illing *et al.* showed that the Abacavir modifies the anchor residue  
71 for the binding peptide in the F-pocket, altering the binding specificity for peptides in B\*57:01 but not  
72 B\*57:03 [8].

73 ADRs are associated with different HLA alleles for numerous different drugs. The ‘HLA and Adverse  
74 Drug Reactions’ database on the Allele Frequency Net Database website [9, 10] allows users to search  
75 for studies showing associations between different HLA alleles and ADRs. The current, most strongly  
76 associated ADR is that of Abacavir (an anti-retroviral drug) with HLA-B\*57:01. If certain alleles  
77 have been significantly associated with ADRs, patients can be screened prior to being given the drug  
78 to predict if an ADR is likely to occur. Mallal *et al.* showed how screening for HLA-B\*57:01 alleles  
79 can reduce the risk of hypersensitivity reactions in patients receiving Abacavir [11]. While there is  
80 still some disagreement which of the models best explains how they interact with drugs to cause  
81 ADRs, Illing *et al.* have demonstrated the Altered Peptide Repertoire model with high confidence for  
82 Abacavir, including a crystal structure of Abacavir bound to the antigen presenting region of HLA-  
83 B\*57:01, as well as proteomics evidence for different peptides being presented than in the unbound

84 case. As a result, many researchers investigating ADRs now work under the assumption that this  
85 hypothesis explains a high proportion of HLA ADRs observed, although much debate continues.  
86 There is therefore considerable and growing interest in searching for evidence supporting this mode  
87 for other ADRs using modelling and bioinformatics techniques, for example using *in silico* molecular  
88 docking [8, 12-15].

89 Molecular docking is used to predict the preferred orientation of a molecule when bound to another in  
90 a stable complex. Most docking programs assume the target to be rigid and allow ligand flexibility  
91 [16]. Protein-ligand docking can be used to aid understanding of biological processes and drug design  
92 [17, 18]. Docking gives a prediction of the structure of the ligand-receptor complex using  
93 computational methods by first sampling the conformations of the ligand in the active site and then  
94 ranking these conformations using a scoring function as a proxy for the free energy of interaction  
95 [19].

96 Molecular docking is being used increasingly commonly for investigating HLA-mediated ADRs [8,  
97 12, 13, 15, 20-25]. The HLA structure presents unusual challenges for molecular docking protocols.  
98 HLAs bind peptides in a long hydrophobic cleft formed between the  $\alpha$ -helices and  $\beta$ -sheet platform.  
99 This cleft is much larger than the naturally evolved binding sites that proteins have for small organic  
100 molecules. The polymorphic residues located along this cleft determine the size and stereochemistry  
101 of the subsites [26]. The peptide binding groove contains six subsites (Fig 1). The specificity of  
102 peptide binding is determined by the interactions between anchor residues on the peptide side chains  
103 and two or more of these subsites [27]. Therefore care must be taken when using docking methods to  
104 investigate these complex cases. The purpose of this exercise is to compare multiple docking  
105 programs to assess their performance on the challenging HLA-ADR cases.

106 **Fig 1. Organisation of the subsites along the HLA peptide binding groove.** The peptide-binding  
107 groove of the HLA molecule is separated into 6 different pockets (A-F) [28, 29] , as shown here.  
108 Image created using PyMOL [30].

109 Four different freely available and commonly used programs were used for docking the compounds  
110 with the target alleles – SwissDock, ROSIE, AutoDock Vina and AutoDockFR, as follows.

111 The SwissDock [31] server is an online tool based on the EADock DSS [32] engine. Target and  
112 ligand structures can be automatically prepared for docking through the server. Target structures can  
113 be selected via PDB records, or user-defined structures can be uploaded in various supported formats.  
114 Ligands can be selected through the ZINC database or by uploading structure files. A range of  
115 docking parameters can be set, including docking type, enabling the user to select a desired docking  
116 time and exhaustiveness, and defining the search space [31]. Due to it being an online tool, it is very  
117 accessible and can be used without the technical knowledge required for some of the more complex  
118 software.

119 The Rosetta Online Server that Includes Everyone (ROSIE) is an online version of the Rosetta 3  
120 software. The server includes different Rosetta protocols, including RosettaLigand which allows small  
121 molecules to be docked into proteins. The target structure must be provided in PDB format. For best  
122 results, residues that Rosetta does not natively recognise (e.g. waters, co-factors or metal ions) should  
123 be removed prior to submission. An SDF file containing the conformers of a single ligand should also  
124 be provided. The approximate location of the binding site should also be specified, as RosettaLigand  
125 cannot perform binding site detection. Again, multiple parameters can be selected [33, 34].

126 Finally, two versions of AutoDock were also used, both tools that can be installed and run locally.  
127 AutoDock Vina was shown to be a strong competitor against six other programs when tested against a  
128 virtual screening benchmark [35]. The latest AutoDock software, AutoDockFR was also used.  
129 AutoDockFR uses a genetic algorithm and scoring function based on the AutoDock4 scoring function.  
130 This program differs from the others as it takes into account receptor flexibility by allowing the user  
131 to specify flexible residues within the target structure, this allows the program to simulate induced fit  
132 caused by ligand binding where changes occur mainly in the residues side chains. This software was  
133 shown to outperform AutoDock Vina for tested datasets [36]. For both of the AutoDock versions,  
134 target and ligand structures are to be provided in PDBQT format. The search space, including the  
135 binding site, must also be specified with other optional parameters also available. AutoDock is  
136 commonly used for in-silico docking of associated drugs with HLA alleles. It is therefore important to  
137 assess the reliability of the different versions of this program when using the complex HLA structure  
138 examples.

139 Two drugs were investigated. Abacavir, an anti-retroviral drug used to suppress HIV replication, is the  
140 most widely investigated drug associating ADRs with HLA. It has been shown that there is a genetic  
141 association between HLA-B\*57:01 and Abacavir [4, 37, 38]. The ADR is thought to be driven by the  
142 activation of CD8+ T cells [39]. The mechanism of Abacavir binding has been experimentally  
143 validated by X-ray crystallography and shown to correspond with the altered peptide repertoire  
144 model. Abacavir binds directly and non-covalently with the HLA-B\*57:01 binding cleft in the F-  
145 pocket (Fig 1) of the peptide-binding groove [40]. This binding results in an alteration of the  
146 physicochemical parameters and topography of the binding groove, altering the presented peptides  
147 and eliciting a polyclonal T-cell response leading to the Abacavir hypersensitivity reaction.  
148 Alterations at key residues within the binding cleft have been shown to prevent the Abacavir  
149 association, by testing closely related allotypes (e.g. HLA-B\*57:03) and comparing the resulting  
150 hypersensitivity reactions seen in the risk B\*57:01 allele [41].

151 The second drug investigated was Carbamazepine, an anti-epileptic drug, which has been strongly  
152 associated with Stevens-Johnson syndrome / toxic epidermal necrolysis (SJS/TEN), with patients  
153 having the B\*15:02 allele showing hypersensitivity [5]. It is thought that the binding of  
154 Carbamazepine alters the self-presented peptides, through direct binding to the HLA molecule, similar  
155 to the Abacavir mechanism. These peptides are then recognised as foreign, leading to an immune  
156 response. Although the binding has not been experimentally validated, *in silico* modelling predicted  
157 the binding of Carbamazepine to HLA-B\*15:02. It was predicted that the Carbamazepine binds in the  
158 D-pocket of B\*15:02, adjacent to residue 156 of the HLA molecule [8]. This is one of the residues  
159 where the HLA-B\*15:01 and HLA-B\*15:02 alleles differ. As hypersensitivity is only seen in patients  
160 with the HLA-B\*15:02 allele but not HLA-B\*15:01, it is likely that this residue plays an important  
161 role in the ADR. A separate study has also predicted the binding site both through site-directed  
162 mutagenesis and *in silico* docking. The results of the site-directed mutagenesis implicated Asn63,  
163 Ile95 and Leu156, found in the D-pocket, in Carbamazepine presentation and T-cell activation as  
164 mutations at these positions (N63E, I95L or L156W) showed reduced binding affinity for  
165 Carbamazepine. *In silico* modelling conducted in the same study showed consistent binding near to  
166 the Arg62 residue located in the D-pocket of the peptide binding groove [14, 41]. These examples can

167 therefore be used to test if the docking methods used predict the same binding position shown in these  
168 previous independent studies.

169 In this work, we used the Abacavir example for which a crystal structure of the complex exists, as a  
170 benchmark for the docking software. By using molecular docking, the binding position of the  
171 Abacavir within the B\*57:01 risk allele HLA structure and, for comparison, with the non-risk control  
172 allele structures was predicted. Controls were chosen from B alleles shown to be non-risk (B\*57:03)  
173 and common HLA-B and HLA-A alleles (B\*07:02 and A\*01:01). We work under the assumption that  
174 for (control) alleles that have not been associated with an ADR, that this is due to drug not binding  
175 sufficiently strongly to affect peptide presentation. Illing *et al.* showed that Abacavir interacts non-  
176 covalently with the B\*57:01 risk allele but not with B\*57:03 control [8]. The docking results were  
177 then compared to the known binding position to estimate the reliability of the docking protocol. In  
178 addition, we assessed to what extent the docking could distinguish between the HLA-associated and  
179 non-HLA-associated alleles. The same methods were used to test if the Carbamazepine binding  
180 position previously seen can be reliably replicated, using the programs showing the most accurate  
181 results for the Abacavir example. Due to there being more evidence available for the Abacavir  
182 example, including a crystal structure of the drug bound in complex, our investigations favour this  
183 example. For the Carbamazepine example, we are comparing our results against a previous prediction  
184 using similar methods.

185 This work sheds light on the utility and reliability of well-known docking programs used to address  
186 the challenging HLA-drug situation. These docking methods may help us to understand the  
187 mechanisms behind ADRs and identify genetic polymorphisms that may be influencing the binding  
188 seen in the risk but not control alleles.

## 189 **2. Methods**

### 190 **2.1. Homology Modelling: Obtaining target structures**

191 For the Abacavir example, B\*57:01 has been shown to be a risk allele and B\*57:03 not associated.

192 For Carbamazepine B\*15:02 was found to be the risk allele, with B\*15:01 not being associated. These  
193 non-associated alleles were therefore used as controls along with a common HLA-B allele (B\*07:02)

194 and HLA-A allele (A\*01:01) which could be assumed to not be associated as they are seen at a high  
 195 frequency across European origin (Caucasian) populations (average frequencies obtained from AFND  
 196 using gold standard populations [9]: B\*57:01 = 0.03, B\*07:02=0.10 and A\*01:01=0.14).

197 The allele structures were obtained from the PDB database, where available. Models were made for  
 198 those alleles where the structure is not publicly available (Table 1). Target and template sequences  
 199 were aligned with ClustalX [42]. For each modelling exercise, ten models were generated using  
 200 Modeller 9.9 automodel class and the model with the lowest objective function score was chosen as  
 201 the model for docking. This objective function is a score generated from the spatial restraints and the  
 202 CHARMM energy terms, reflecting stereochemistry within the structure [43]. In these simple cases  
 203 there was no need to explore alternative target-template alignments since sequences could be aligned  
 204 unambiguously with no insertions or deletions.

205 **Table 1. Structures of risk and control HLA alleles used in docking experiments. To distinguish**  
 206 **between crystal structures and those created by homology models in the rest of the text, we add**  
 207 **labels with suffix “sN” and “mN” where s means crystal structure and m means homology**  
 208 **model, N is an integer where multiple models have been created.**

| Drug          | Risk Allele | Risk Allele Structure                                                                            | Control Allele | Control Allele Structure                                      |
|---------------|-------------|--------------------------------------------------------------------------------------------------|----------------|---------------------------------------------------------------|
| Abacavir      | B*57:01     | 3VRI [8] ( <i>B5701_s</i> )                                                                      | B*57:03        | 2BVP [44] ( <i>B5703_s</i> )                                  |
|               |             | Homology model using B*52:01 (3W39 [45]) and B*58:01 (5IM7 [46]) as templates ( <i>B5701_m</i> ) |                | Homology model using B*57:01 as a template ( <i>B5703_m</i> ) |
|               |             | 2RFX [39] ( <i>B5701_s2</i> )                                                                    |                | Homology model using B*57:01 and B*07:02 ( <i>B5703_m2</i> )  |
|               |             |                                                                                                  |                |                                                               |
|               |             |                                                                                                  | B*07:02        | 4U1H [47] ( <i>B0702_s</i> )                                  |
|               |             |                                                                                                  | A*01:01        | 3BO8[48] ( <i>A0101_s</i> )                                   |
| Carbamazepine | B*15:02     | Homology model using B*15:01                                                                     | B*15:01        | 1XR9 [49] ( <i>B1501_s</i> )                                  |



|  |                                |         |                              |
|--|--------------------------------|---------|------------------------------|
|  | as template ( <i>B1502_m</i> ) | B*07:02 | 4U1H [47] ( <i>B0702_s</i> ) |
|  |                                | A*01:01 | 3BO8 [48] ( <i>A0101_s</i> ) |

209 The Abacavir risk and control alleles were used to evaluate the homology modelling as the known  
210 structures are available for each allele investigated and so can be compared with the model structure  
211 and docking results. Two models were created for B\*57:03, one with one template allele (B5703\_m)  
212 and another with two template alleles (B5703\_m2). These models could then be compared to the  
213 known structure of B\*57:03 (B5703\_s), as could the docking predictions, to understand the influence  
214 of these steps when employed in a typical docking protocol. The structure of B\*57:01 was also  
215 modelled (B5701\_m), from two similar sequences identified to make similar comparisons and  
216 evaluate the reliability of using homology modelling.

217 For the Carbamazepine risk associated allele B\*15:02, there are four differing residues with control  
218 allele B\*15:01. Three of these lie in the peptide binding groove, with only one of these being vital to  
219 the D-pocket architecture, where the Carbamazepine is predicted to bind (pos 156). Only a single  
220 template, the structure of B\*15:01, was therefore used to model B\*15:02 (B1502\_m).

221 The quality of each model was investigated using Ramachandran plots and QMEAN scores. For the  
222 B5701\_m and B5703\_m and m2, RMSDs were used to give a measure of how well the models  
223 represent the known structures. The percentage sequence identity for each of the templates used for  
224 each model are shown in S1 Table.

### 225 **2.1.1. Conformational sampling of receptor protein structures**

226 In order to identify the flexible side chains for the target structure, the relax function of Rosetta was  
227 used to explore the conformational properties of each residue. By looking at 10 different relaxed  
228 structures for each target, flexible residues can be identified. This allows us to consider the flexibility  
229 of the target structure when using AutoDockFR. When using the ROSIE server, a similar sampling is  
230 incorporated into the docking procedures [34].

## 231 **2.2. Docking**

### 232 **2.2.1. SwissDock**

233 Using SwissDock [31], the default parameters search the whole target structure but by setting the  
234 search space parameters, it is possible to restrict binding to perform a local docking assay using the  
235 known binding pocket. Here, the area of interest is the peptide binding groove, including residues 1-  
236 180 of the alpha chain. The search space was therefore restricted to this area of interest. The file was  
237 processed to ensure it was in the correct format to be uploaded to SwissDock. This included removing  
238 the ligand and peptide from the structure. The PDB was then passed through the Prepdock server [50]  
239 to prepare the structure for docking. This prepared file was then submitted to SwissDock with the  
240 relevant known drug structures. SwissDock used the ZINC database to obtain the known structures of  
241 compounds (Abacavir ZINC ID: 2015928, Carbamazepine ZINC ID: 4785).

### 242 **2.2.2. ROSIE**

243 ROSIE [33, 34], was also used in a similar way. The PDB files were again prepared, removing the  
244 Abacavir and peptide from 3VRI and this time also removing the water molecules from the target  
245 structure, as Rosetta is unable to natively recognise these residues. The Abacavir drug structure was  
246 extracted from the relevant PDB (3VRI) and converted to SDF format. This was then submitted to the  
247 server to be docked, with the search space specified to centre on the peptide binding groove. This  
248 process was repeated for each of the risk and control alleles to be investigated.

### 249 **2.2.3. AutoDock**

250 Two versions of AutoDock were also used, AutoDock Vina [35] and the later version AutoDockFR  
251 [36]. AutoDock Tools [51] was used to prepare the PDBQT files for both the target HLA alleles and  
252 the ligand structure. The drug structures for Abacavir was extracted from the 3VRI PDB file [8]. For  
253 Carbamazepine, there is no crystal structure available for the drug bound to a target and so the PDB  
254 file was obtained from the ZINC entry previously used for the SwissDock docking and from the  
255 Drugbank structure.

256 Using AutoDock Vina, a search space of 40x40x40Å was used. Initially, the default exhaustiveness  
257 was used but this was then increased gradually to identify the best parameters to find the closest  
258 docking poses of Abacavir to the native position seen in the crystal structure. Once this was identified,  
259 the process was then repeated for the other alleles, using the same parameters.

260 Using AutoDockFR, the docking was performed twice, either assuming the target as rigid or allowing  
261 for flexible residues. The aligned alleles and the ligand PDB files were converted to PDBQT files  
262 using AutoDock Tools [51]. The target structure and ligands were then loaded separately into  
263 AutoGridFR [52]. The pockets located within the target structure were identified and the search space  
264 selected to 1) surround the known binding position of the ligand, 2) surround the peptide binding  
265 groove and 3) surround the top three largest pockets identified. By selecting the top three pockets, this  
266 increases the search space and gives the opportunity for the ligand to bind in an alternative pocket and  
267 can tell us if the peptide binding groove is indeed the favoured binding region or not. The affinity  
268 maps are then generated by AutoGridFR and these are then inputted into AutoDockFR along with the  
269 ligand and the parameters for the docking. This process was repeated for each of the alleles, using the  
270 three different search spaces. As AutoDockFR only gives the binding pose for the top binding  
271 solution, AutoDockFR was ran in batches in order to obtain multiple binding poses. The top pose is  
272 therefore given for a selection of ten runs as opposed to the top ten poses for one run, as seen in the  
273 other examples.

274 Rosetta Relax was used to identify flexible side chains. These residues were then selected as flexible  
275 in AutoGridFR and the search space was set along the peptide binding groove, encompassing these  
276 residues. The affinity maps were generated and as before, inputted into AutoDockFR.

277 It was predicted that AutoDockFR may show more accurate docking predictions for unbound  
278 structures than those using the 3VRI crystal structure with both Abacavir and the peptide removed. As  
279 a result, the structure of HLA-B\*57:01 without Abacavir bound (*B5701\_s2*) was obtained from the  
280 PDB database (2RFY [39]). The peptide bound was removed and the B\*57:01 structure was used in a  
281 similar way to give predicted binding when searching the peptide binding groove, assuming the  
282 receptor to be either rigid or flexible.

283 The results files from all the docking programs were then processed. The RMSDs (Root-Mean-Square  
284 Deviation) between the non-hydrogen atoms of the docked poses and the known binding position of  
285 Abacavir were calculated through PyMOL [30] using the “rms\_cur” command. RMSDs were used to  
286 give a quantitative guide to how close the prediction poses lay to the known binding mode of  
287 Abacavir. The RMSDs along with visual inspection and docking scores were used to assess the

288 reliability of each of the docking programs. The scores were also used to investigate the relationship  
289 between the binding scores and positions. The binding predictions for Carbamazepine were compared  
290 to predictions from previous studies in a similar way although RMSDs could not be measured for that  
291 case as no crystal structure was available.

## 292 **3. Results**

### 293 **3.1. Homology Modelling**

294 The first analysis was to explore the overall effect of homology modelling on the reliability of results  
295 from *in silico* docking. As expected, given the small number of amino-acid differences between  
296 models and templates, the QMean and Ramachandran plots for each of the alleles were shown to be  
297 within acceptable limits, showing the models to be of good quality. B5701\_m was shown to be very  
298 similar to the known structure B5701\_s with RMSD 0.81 Å (266 to 266 atoms). The B\*57:03 models  
299 also showed low RMSDs (B5703\_m = 1.46 Å (266 to 266 atoms), B5703\_m2 = 1.24 Å (266 to 266  
300 atoms)) when compared to the known structure B5703\_s. The two differing residues between the  
301 B\*57:03 and B\*57:01 alleles (position 114 and 116) both lie along the peptide binding groove and are  
302 vital for the architecture of the F-pocket shown to be the known binding position of Abacavir. It is  
303 therefore important that the model correctly represents the allele structure. When comparing the  
304 B\*57:03 and B\*07:02 control allele structures used for the Abacavir example with B5701\_s, it could  
305 be seen that the tyrosine at position 116 for the B\*57:03 and B\*07:02 known structures overlaps with  
306 the known binding position of the Abacavir. It would be expected for the tyrosine in the B\*57:03  
307 model to show a similar conformation to that seen in these known structures. This was not seen in the  
308 B5703\_m model but was seen in the B5703\_m2 model in which two templates were used (S1 Fig).  
309 Using two templates for the model gave a more accurate representation of this element of the target  
310 structure in this case.

### 311 **3.2. Abacavir**

312 **3.2.1. All docking software assessed could dock Abacavir into the risk allele crystal structure**  
313 **but could not always predict the correct binding mode**

314 Using SwissDock, it can be seen that the B5701\_s example gives a docking solution close to the  
315 native position (Fig 2 a-c) with all poses showing binding in the F-pocket. When using AutoDockFR  
316 assuming the receptor to be rigid, similar results were seen to those using SwissDock (Fig 2 d-f). All  
317 poses for the B5701\_s risk allele were shown bound in the same pocket as the known binding  
318 position. Little difference was seen between the docking shown for each search space, with only one  
319 pose from the B\*57:01 run showing binding outside of the peptide binding groove when the search  
320 space was extended around the whole protein (data not shown). This indicates that the peptide binding  
321 groove is the most favourable region for binding. It can be concluded overall that the Abacavir docks  
322 in the expected binding pocket for these packages, but they cannot predict the exact native pose.

323 **Fig 2. Binding positions for B\*57:01 (B5701\_s1) with Abacavir using SwissDock (a-c) and**  
324 **AutoDockFR (d-f).** Predicted Abacavir binding positions using SwissDock (a-c) and AutoDockFR  
325 (d-f) are shown by white molecules with B5701\_s1 shown as grey structure. The known binding  
326 position of Abacavir is shown in red. (a) All binding poses using SwissDock, (b) SwissDock pose 1  
327 giving lowest RMSD of 2.02Å and (c) SwissDock pose 4 giving a higher RMSD of 6.92Å due to  
328 reversed orientation, (d) All binding poses using AutoDockFR, (e) AutoDockFR pose 3 giving lowest  
329 RMSD of 2.25Å and (f) AutoDockFR pose 5 giving a higher RMSD of 6.92Å due to reversed  
330 orientation. AutoDockFR docking ran using the search space centred on the known binding position  
331 of the ligand.

332 As the ROSIE server allows movement of side chains within the target, the modelled structure of the  
333 B\*57:01 risk allele target was compared to the B5703\_s structure submitted. This resulted in the  
334 RMSDs shown in Table 2 with B5701\_s giving similar average RMSDs to the control alleles.  
335 Comparing the lowest RMSDs, the control structures give poses with lower RMSDs than B5701\_s.

336 **Table 2: RMSD measurements for Abacavir docked with B\*57:01, B\*07:02 and B\*57:03**  
337 **models, using the different software.**

|                         |              | RMSDs (Å) |         |           |           |         |           |            |         |           |           |         |           |           |         |           |
|-------------------------|--------------|-----------|---------|-----------|-----------|---------|-----------|------------|---------|-----------|-----------|---------|-----------|-----------|---------|-----------|
|                         |              | B*57:01_s |         |           | B*57:03_m |         |           | B*57:03_m2 |         |           | B*57:03_s |         |           | B*07:02_s |         |           |
| Software                | Search space | Lowest    | Average | Highest   | Lowest    | Average | Highest   | Lowest     | Average | Highest   | Lowest    | Average | Highest   | Lowest    | Average | Highest   |
| SwissDock               | PBG          | 2.02 (1)  | 5.03    | 8.46 (5)  | 2.93 (1)  | 5.32    | 8.25 (2)  | 5.41 (5)   | 6.91    | 7.70 (0)  | 7.34 (5)  | 11.65   | 15.69 (1) | 6.20 (5)  | 10.15   | 18.28 (2) |
| ROSIE                   | PBG          | 3.16 (1)  | 4.87    | 10.69 (2) | 2.56 (8)  | 4.69    | 10.08 (8) | 2.21 (3)   | 4.53    | 10.95 (6) | 2.87 (4)  | 5.05    | 7.60 (8)  | 2.24 (8)  | 3.64    | 5.66 (5)  |
| AutoDock Vina (exh=8)   | PBG          | 1.06 (3)  | 6.11    | 15.88 (7) | 4 (1)     | 7.13    | 8.76 (6)  | 5.26 (3)   | 8.79    | 15.55 (8) | 9.30 (8)  | 11.90   | 14.85 (3) | 5.92 (3)  | 8.35    | 12.25 (4) |
| AutoDock Vina (exh=112) | PBG          | 0.98 (6)  | 5.75    | 8.36 (5)  | 4.02 (2)  | 7.51    | 9.29 (7)  | 4.85 (8)   | 7.45    | 8.41 (3)  | 9.07 (8)  | 12.01   | 14.84 (4) | 5.46 (6)  | 10.43   | 18.33 (2) |
| AutoDock FR             | Ligand       | 2.25      | 5.70    | 7.64      | 4.85      | 6.21    | 8.14      | 4.06       | 7.52    | 8.60      | 4.45 (1)  | 4.75    | 4.96 (5)  | 3.69      | 4.93    | 6.77      |
| AutoDock FR             | PBG          | 2.24      | 6.38    | 8.01      | 4.94      | 6.38    | 9.04      | 6.88       | 8.61    | 9.23      | 12.8 (4)  | 13.3    | 14.36 (5) | 12.51     | 15.06   | 18.21     |
| AutoDock FR             | Top 3        | 2.21      | 8.33    | 22.56     | 5.14      | 6.15    | 8.24      | 8.12       | 8.62    | 9.19      | 7.92 (6)  | 13.02   | 14.34 (3) | 12.61     | 18.14   | 42.64     |

For AutoDock Vina, exhaustiveness is shown in brackets as (exh=). The lowest and highest RMSDs are shown along with the averages for all poses, pose rank is shown in brackets. (For SwissDock, poses are ranked from 0-5. For ROSIE and AutoDock Vina, poses are ranked from 0-9. Rank is not shown for AutoDock FR, as each pose was taken from top pose for each of 10 runs). Search spaces include surrounding the peptide binding groove (PBG), surrounding around the known ligand binding position (Ligand) and surrounding the top three largest binding pockets to increase the search space to enable binding away from the peptide binding groove (Top 3).

340 When docking the Abacavir structure using AutoDock Vina, the exhaustiveness was investigated  
341 using the B\*57:01 example (B5701\_s) to optimise the protocol before docking the other non-risk  
342 alleles. Using the default exhaustiveness of 8, the RMSD values were shown to be quite variable  
343 (Table 2). The exhaustiveness was then increased starting at exh=18 and doubling the exhaustiveness  
344 to see the effect. It was found that the exhaustiveness of 112 gave the lowest RMSDs overall and  
345 these did not improve with further increasing of exhaustiveness

### 346 **3.2.2. Most docking software assessed can distinguish between risk and control alleles**

347 Two methods were used to investigate if the docking software can distinguish between the risk alleles.  
348 RMSD values, alongside some visual inspection, were used to give a measure of how similar the  
349 docking prediction results are to the known binding position obtained from the crystal structure.  
350 Docking scores were also investigated to see if there is more favourable binding seen in the risk  
351 alleles compared to the controls and also how the scores differ between the predicted poses for the  
352 risk allele itself.

353 Using RMSDs, it can be seen from Figure 3 and Table 2 that most of the software, excluding  
354 “AutoDockFR (Ligand)” and ROSIE, showed lower RMSD’s for B\*57:01 than the other control  
355 alleles investigated and were able to distinguish between the known risk allele structure (B5701\_s)  
356 and the known control allele structures (B0702\_s and B5703\_s). AutoDockFR using a search space  
357 surrounding the known binding position of the Abacavir ligand, “AutoDockFR (Ligand)”, shows  
358 lowest median RMSD’s for B\*07:02. ROSIE shows lowest median RMSD’s for all the alleles  
359 investigated. AutoDock Vina (with exhaustiveness 112) was able to achieve the lowest RMSD overall  
360 for B\*57:01 (0.98 Å) but showed more variability between poses, giving a higher average RMSD,  
361 although this was still lower than the average RMSDs for the control alleles. Using SwissDock and  
362 AutoDockFR, the control alleles showed higher RMSDs than the risk B\*57:01 allele although it can  
363 be seen that some poses gave higher RMSDs, similar to those seen for the control alleles. Some of the  
364 predicted poses for the B\*57:01 allele were shown to be binding in the correct pocket but gave a  
365 higher RMSD due to the reversed orientation (Fig 2c & 2f). By examining these poses it can be seen  
366 that the ligand makes similar interactions to the correct binding pose (S2 Fig) but the reversed

367 orientation results in the higher RMSD. It is therefore important to consider both the poses and the  
368 RMSD scores when comparing binding results.

369 **Fig 3. Boxplots to show RMSD values of Abacavir poses with respect to the known structure.**

370 Plots grouped by (a) Allele and (b) software. Search spaces for AutoDockFR are shown in brackets  
371 and include surrounding the peptide binding groove (PBG), surrounding around the known ligand  
372 binding position (Ligand) and surrounding the top three largest binding pockets to increase the search  
373 space to enable binding away from the peptide binding groove (Top 3). For AutoDock Vina,  
374 exhaustiveness is shown in brackets.

375 Figure 4 shows the docking poses for the control alleles using SwissDock. It can be seen that the  
376 Abacavir binds further from the known binding position from 3VRI, with A\*01:01 showing the  
377 largest difference from the B\*57:01 allele, predicting binding away from the peptide binding groove  
378 (RMSDs: lowest = 21.44 Å, average = 23.23 Å, highest = 25.47 Å).

379 **Figure 4: All docking poses of Abacavir for control alleles using SwissDock.** (a) B\*57:03 using  
380 one template (*B5703\_m*), (b) B\*57:03 using two templates (*B5703\_m2*), (c) B\*07:02 (*B0702\_s*) and  
381 (d) A\*01:01 (*A0101\_s*). Known binding position of Abacavir shown in red. Poses can be seen further  
382 from the native pose than found in the risk allele docking.

383 It can be seen that B\*57:01 generally had a lower average RMSD than the control alleles for all  
384 software, excluding ROSIE, even with these reversed orientations discussed, with the lowest RMSD  
385 being constantly lower than those seen for the controls. Both control alleles B\*57:03 and B\*07:02  
386 contain a tyrosine at position 116, rather than the serine seen in the risk allele, with A\*01:01 having  
387 an aspartic acid at position 116. This residue is sensitive for the F-pocket architecture as it lies along  
388 the base of the pocket [53] and so this mutation prevents binding in this native position.

389 The full fitness scores for SwissDock poses were investigated, with lower scoring poses being more  
390 favourable than higher scoring poses. Scores were compared between B\*57:01, B\*57:03 and  
391 B\*07:02, it was found that poses for the B\*57:01 risk allele scored more poorly than those for the  
392 non-risk alleles (Fig 5a), with the control alleles showing lower scores than the risk allele. This  
393 implies that comparison of scores between alleles is not valid since better docking results were seen



394 for the risk allele. Put another way, the docking scores were not able to distinguish between the risk  
395 and control alleles. Nevertheless, the scores for the B\*57:01 risk allele are a good guide to pose  
396 accuracy, as there is a modest positive correlation between RMSD and score (Fig 5b), with an  $R^2$   
397 value of 0.65.

398 **Fig 5. Full fitness scores versus RMSD.** (a) Scatterplot to show the full fitness scores vs RMSDs for  
399 each pose for each of the different alleles. The non-risk allele poses have lower scores than poses for  
400 the risk allele. (b) Scatterplot to show full fitness score vs RMSD for B\*57:01 poses.

### 401 **3.2.3. Docking performance can be degraded by using a homology model**

402 The docking of Abacavir with the known and modelled structures of B\*57:01 and B\*57:03 were  
403 compared (S3 Fig). This allowed us to compare the docking positions between known and modelled  
404 structures. B5701\_m showed an unexpected overlap between the Ser116 residue and the known  
405 binding position on Abacavir from 3VRI. This prevented the docking from predicting the exact native  
406 pose. However, poses were still predicted within the F-pocket and had lower RMSDs seen than those  
407 predicted for the non-risk alleles. This slight difference between the modelled and known structures  
408 may be due to the peptide bound in the peptide binding groove of the 3VRI structure.

409 The docking of Abacavir to the known structure of the control allele B5703\_s showed similar results  
410 to the modelled structures, with poses seen away from the known Abacavir binding position and  
411 higher RMSDs (S4 Fig). The average RMSDs seen with the B\*57:03 known structure were higher  
412 than those seen with the homology models, showing the Abacavir docks further from the known  
413 binding position with the known structure.

### 414 **3.2.4. Receptor flexibility negatively affects the docking performance**

415 When the flexible residues were incorporated for the 3VRI docking with Abacavir example, poses  
416 occupied the whole peptide binding groove and did not favour the F-pocket as expected (Fig 6). When  
417 the scores for the poses found inside the F-pocket were compared to those found outside the F-pocket,  
418 it was also seen that these scores did not favour the F-pocket (data not shown). Thus, although the  
419 complex algorithms developed for AutoDockFR have been shown to improve the success of docking

420 [36] in general, they degraded performance in our example, suggesting that they should only be used  
421 with caution for HLA docking.

422 **Fig 6. Abacavir docked with B\*57:01 structure (3VRI), using ADFR assuming the receptor to**  
423 **be flexible.** Poses are seen along the whole groove and not just the F-pocket (shown in orange). The  
424 docking is unable to predict the native-like poses (known binding of Abacavir shown in red).

### 425 **3.2.5. Using AutoDockFR cannot compensate for the added difficulty of docking to the unbound** 426 **target**

427 AutoDockFR was also used to dock Abacavir with the unbound structure of HLA-B\*57:01 (2RFX  
428 [39]), crystallised in the absence of drug, in order to test the possibility that the structure without  
429 Abacavir bound would yield better docking results when flexibility of residues was considered. The  
430 peptide was removed from 2RFX and the B\*57:01 structure was used as the target. Again, two runs  
431 were completed, assuming the receptor to be either rigid or flexible.

432 Docking to the structure assuming rigid side chains produced poses in both the B and F pockets (Fig  
433 7a). However, the lowest RMSD is seen as 8Å and is therefore not very accurate when comparing to  
434 the known binding position. When looking at the poses, it can be seen that the native pose could not  
435 be predicted. When flexible residues were incorporated with AutoDockFR (Fig 7b), the entire peptide  
436 binding groove was again occupied.

437 **Fig 7. Abacavir docked with unbound B\*57:01 structure (2RFX), using ADFR.** (a) Assuming the  
438 receptor to be rigid. Only a few poses can be seen bound within the F-pocket (shown in orange), with  
439 these poses showing incorrect conformation. The docking was unable to predict native-like poses  
440 (known binding of Abacavir shown in red). (b) Assuming the receptor to be flexible. Poses are found  
441 along the whole groove and not just the F-pocket (shown in orange). The docking is unable to predict  
442 the native-like poses (known binding of Abacavir shown in red).

443 Although AutoDockFR gives good results for the ideal case when docking the Abacavir structure  
444 back into the B\*57:01 structure obtained from 3VRI (by removing both the ligand and the peptide), it  
445 is shown here that docking using the unbound structure, crystallised in the absence of the drug,  
446 showed less accurate results and the correct binding position could not be identified. This highlights

447 the difficulties of using docking to investigate these challenging HLA-ADR cases as in general  
448 docking for new ADRs will be performed, for example, on structures that have a peptide already  
449 bound but not the drug that is to be docked.

### 450 **3.3. Carbamazepine**

451 SwissDock and AutoDockFR were best able to predict the binding positions of Abacavir and so these  
452 programs were both used to predict the binding position of Carbamazepine with both the risk allele  
453 (B1502\_m) and the control alleles (B1501\_s, A0101\_s and B070\_s2). The predicted poses were  
454 compared to those shown in previous studies in which B\*15:02 showed binding in the D-pocket, close  
455 to residues 62, 63, 95 and 156 [8, 14].

456 Docking Carbamazepine with B1502\_m using SwissDock, the poses were predicted to sit in the D-  
457 pocket previously identified as of interest. Looking at the docking results (Fig 8a), it can be seen that  
458 Carbamazepine is predicted to bind in the D-pocket of B\*15:02, close to Leu156, identified by the  
459 study as important, with only one pose predicted out of this pocket. Using AutoDockFR, the same  
460 general pattern was seen with the D-pocket generally being favoured for B\*15:02 (Fig 8b). Using  
461 SwissDock, the B\*15:01 docking showed poses predicted to bind elsewhere, away from this pocket,  
462 as predicted. For the B\*15:01, A\*01:01 and B\*07:02 alleles, with a mutation at this 156 position  
463 (Leu→Trp, Leu→Arg and Leu→Arg respectively), this D-pocket is closed off and produces poses  
464 elsewhere (S5 Fig). Using AutoDockFR, the same general pattern was seen with no poses being found  
465 in or around the D-pocket for B\*15:01. These predictions cannot be validated since there is, as of yet,  
466 no crystal structure available for Carbamazepine bound to HLA. However, when compared to  
467 previous studies, our results showed a similar binding position using different software.

468 **Fig 8. Docking Carbamazepine with B\*15:02 risk allele using SwissDock and AutoDockFR.** (a)  
469 SwissDock and (b) AutoDockFR poses for Carbamazepine docked with B\*15:02 risk allele. Residue  
470 at 116 shown in red, with other D-pocket residues shown in blue.

### 471 **4. Discussion**

472 The purpose of this exercise was to compare multiple docking programs to assess their performance  
473 with these challenging HLA-ADR cases. We used the Abacavir example as the benchmark for the

474 docking software, as the crystal structure is available for Abacavir bound in complex with its  
475 associated risk allele. We used the different docking programs to re-dock the Abacavir into the risk  
476 allele and measure how accurately each program could predict the known binding position. It was  
477 found that the binding modes can sometimes be predicted but not always. Each docking program used  
478 was able to predict the Abacavir binding within the F-pocket and, with the exception of the ROSIE  
479 server, was also able to distinguish between the risk and control alleles with the best scoring poses for  
480 the control alleles being seen further from the known binding position and in some cases, away from  
481 the F-pocket. This was also generally reflected in the RMSDs, although it is important to consider  
482 these alongside the poses themselves as reversed orientations can give higher RMSDs for poses found  
483 close to the known binding position.

484 Using the same docking methods to investigate the Carbamazepine example, the docking programs  
485 used were able to recreate previously published predictions. The docking software was also able to  
486 distinguish between the risk and control alleles with the risk allele showing binding in the D-pocket  
487 and the other control alleles showing poses away from the D-pocket.

488 Here we also investigated the impact of homology modelling on the docking performance. Homology  
489 models are commonly used for docking, especially with *in silico* database screening and have been  
490 shown to give accurate docking predictions [54-57]. However, localised errors can still have a big  
491 impact and so special caution should be used when there is no crystal structure available for the  
492 docking. It is important to ensure the models are as accurate as possible in order to give accurate  
493 predictions. Especially when mutations may impact the architecture of the predicted binding pocket,  
494 such as in the Abacavir example.

495 Predictions of docking poses have subsequently been experimentally validated by a crystal structure.  
496 Yang et al. [58] predicted binding of Abacavir to B\*57:01 in the F-pocket and predicted positions 114  
497 and 116 as important for binding. This was then confirmed once the crystal structure of the HLA-drug  
498 complex was determined [8]. Other predictions have also been made which fit well with experimental  
499 data, about binding of Carbamazepine, for example, and have been in accord with the experimental  
500 data [5].

501 Caution is needed to overcome the challenges produced from docking with the HLA structures. The  
502 long hydrophobic peptide-binding cleft is separated into subsites and small molecules can bind in any  
503 of these subsites along the cleft. The binding of drugs to HLA is probably weaker than many natural  
504 and drug-target interactions as the HLA binding site has not naturally evolved to recognise the drug,  
505 nor has the drug been designed or discovered in a structure-based fashion. This presents challenges  
506 for docking as there may be fewer interactions formed and less steric complementarity between the  
507 drug and its HLA recognition site. A further complication is the possibility that bound peptides may  
508 stabilise drug poses that would not otherwise be energetically favourable. Addressing this issue  
509 computationally is beyond the capability of current tools but the possibility should be borne in mind.  
510 Furthering our understanding of the potentials and limitations of docking small molecules to HLA is  
511 important to aid our understanding of the underlying mechanisms involved with these ADRs.  
512 Understanding these mechanisms and how the binding of small molecules varies between risk and  
513 control alleles may enable us to make predictions of potential ADRs by identifying polymorphisms  
514 which may contribute to direct binding. This may also lead to improved understanding and predictions  
515 of ADRs, ultimately leading to reduced risk due to screening procedures.

## 516 **Acknowledgements**

517 The research was part-funded by the Medical Research Council grant for the Centre for Drug Safety  
518 Science, University of Liverpool (Grant Number: MR/L006758/1). The funders had no role in study  
519 design, data collection and analysis, decision to publish, or preparation of the manuscript.

## 520 **References**

- 521 [1] I.R. Edwards, J.K. Aronson, Adverse drug reactions: definitions, diagnosis, and management,  
522 *Lancet*, 356 (2000) 1255-1259.  
523 [2] A.O. Vazquez-Alvarez, L.M. Brennan-Bourdon, A.R. Rincon-Sanchez, M.C. Islas-Carbajal, S.G.  
524 Huerta-Olvera, Improved drug safety through intensive pharmacovigilance in hospitalized pediatric  
525 patients, *BMC Pharmacol Toxicol*, 18 (2017) 79.  
526 [3] D.F. Carr, M. Chaponda, A.L. Jorgensen, E.C. Castro, J.J. van Oosterhout, S.H. Khoo, D.G.  
527 Lalloo, R.S. Heyderman, A. Alfirevic, M. Pirmohamed, Association of human leukocyte antigen  
528 alleles and nevirapine hypersensitivity in a Malawian HIV-infected population, *Clin Infect Dis*, 56  
529 (2013) 1330-1339.  
530 [4] W. Tangamornsuksan, O. Lohitnavy, C. Kongkaew, N. Chaiyakunapruk, B. Reisfeld, N.C.  
531 Scholfield, M. Lohitnavy, Association of HLA-B\*5701 genotypes and abacavir-induced  
532 hypersensitivity reaction: a systematic review and meta-analysis, *J Pharm Pharm Sci*, 18 (2015) 68-  
533 76.  
534 [5] P. Zhou, S. Zhang, Y. Wang, C. Yang, J. Huang, Structural modeling of HLA-  
535 B\*1502/peptide/carbamazepine/T-cell receptor complex architecture: implication for the molecular

- 536 mechanism of carbamazepine-induced Stevens-Johnson syndrome/toxic epidermal necrolysis, *J*  
537 *Biomol Struct Dyn*, DOI 10.1080/07391102.2015.1092476(2015) 1-12.
- 538 [6] S.G. Marsh, W.H.O.N.C.f.F.o.t.H. System, Nomenclature for factors of the HLA system, update  
539 June 2010, *Tissue Antigens*, 76 (2010) 514-518.
- 540 [7] J. Yun, F. Cai, F.J. Lee, W.J. Pichler, T-cell-mediated drug hypersensitivity: immune mechanisms  
541 and their clinical relevance, *Asia Pac Allergy*, 6 (2016) 77-89.
- 542 [8] P.T. Illing, J.P. Vivian, N.L. Dudek, L. Kostenko, Z. Chen, M. Bharadwaj, J.J. Miles, L. Kjer-  
543 Nielsen, S. Gras, N.A. Williamson, S.R. Burrows, A.W. Purcell, J. Rossjohn, J. McCluskey, Immune  
544 self-reactivity triggered by drug-modified HLA-peptide repertoire, *Nature*, 486 (2012) 554-558.
- 545 [9] F.F. Gonzalez-Galarza, L.Y. Takeshita, E.J. Santos, F. Kempson, M.H. Maia, A.L. da Silva, A.L.  
546 Teles e Silva, G.S. Ghattaoraya, A. Alfirevic, A.R. Jones, D. Middleton, Allele frequency net 2015  
547 update: new features for HLA epitopes, KIR and disease and HLA adverse drug reaction associations,  
548 *Nucleic Acids Res*, 43 (2015) D784-788.
- 549 [10] G.S. Ghattaoraya, Y. Dundar, F.F. Gonzalez-Galarza, M.H. Maia, E.J. Santos, A.L. da Silva, A.  
550 McCabe, D. Middleton, A. Alfirevic, R. Dickson, A.R. Jones, A web resource for mining HLA  
551 associations with adverse drug reactions: HLA-ADR, Database (Oxford), 2016 (2016).
- 552 [11] S. Mallal, E. Phillips, G. Carosi, J.M. Molina, C. Workman, J. Tomazic, E. Jagel-Guedes, S.  
553 Rugina, O. Kozyrev, J.F. Cid, P. Hay, D. Nolan, S. Hughes, A. Hughes, S. Ryan, N. Fitch, D.  
554 Thorborn, A. Benbow, P.-S. Team, HLA-B\*5701 screening for hypersensitivity to abacavir, *N Engl J*  
555 *Med*, 358 (2008) 568-579.
- 556 [12] D.F. Carr, S. Bourgeois, M. Chaponda, L.Y. Takeshita, A.P. Morris, E.M. Castro, A. Alfirevic,  
557 A.R. Jones, D.J. Rigden, S. Haldenby, S. Khoo, D.G. Laloo, R.S. Heyderman, C. Dandara, E.  
558 Kampira, J.J. van Oosterhout, F. Ssali, P. Munderi, G. Novelli, P. Borgiani, M.R. Nelson, A. Holden,  
559 P. Deloukas, M. Pirmohamed, Genome-wide association study of nevirapine hypersensitivity in a sub-  
560 Saharan African HIV-infected population, *J Antimicrob Chemother*, 72 (2017) 1152-1162.
- 561 [13] G. Van Den Driessche, D. Fourches, Adverse drug reactions triggered by the common HLA-  
562 B\*57:01 variant: a molecular docking study, *J Cheminform*, 9 (2017) 13.
- 563 [14] C.Y. Wei, W.H. Chung, H.W. Huang, Y.T. Chen, S.I. Hung, Direct interaction between HLA-B  
564 and carbamazepine activates T cells in patients with Stevens-Johnson syndrome, *J Allergy Clin*  
565 *Immun*, 129 (2012) 1562-+.
- 566 [15] H. Luo, T. Du, P. Zhou, L. Yang, H. Mei, H. Ng, W. Zhang, M. Shu, W. Tong, L. Shi, D.L.  
567 Mendrick, H. Hong, Molecular docking to identify associations between drugs and class I human  
568 leukocyte antigens for predicting idiosyncratic drug reactions, *Comb Chem High Throughput Screen*,  
569 18 (2015) 296-304.
- 570 [16] N.S. Pagadala, K. Syed, J. Tuszynski, Software for molecular docking: a review, *Biophys Rev*, 9  
571 (2017) 91-102.
- 572 [17] T. Lengauer, M. Rarey, Computational methods for biomolecular docking, *Curr Opin Struct Biol*,  
573 6 (1996) 402-406.
- 574 [18] M. Gaba, P. Gaba, S. Singh, G.D. Gupta, AN OVERVIEW ON MOLECULAR DOCKING,  
575 *International Journal of Drug Development & Research*, 2 (2010) 219-231.
- 576 [19] X.Y. Meng, H.X. Zhang, M. Mezei, M. Cui, Molecular docking: a powerful approach for  
577 structure-based drug discovery, *Curr Comput Aided Drug Des*, 7 (2011) 146-157.
- 578 [20] J.I. Goldstein, L.F. Jarskog, C. Hilliard, A. Alfirevic, L. Duncan, D. Fourches, H. Huang, M.  
579 Lek, B.M. Neale, S. Ripke, K. Shianna, J.P. Szatkiewicz, A. Tropsha, E.J. van den Oord, I. Cascorbi,  
580 M. Dettling, E. Gazit, D.C. Goff, A.L. Holden, D.L. Kelly, A.K. Malhotra, J. Nielsen, M.  
581 Pirmohamed, D. Rujescu, T. Werge, D.L. Levy, R.C. Josiassen, J.L. Kennedy, J.A. Lieberman, M.J.  
582 Daly, P.F. Sullivan, Clozapine-induced agranulocytosis is associated with rare HLA-DQB1 and HLA-  
583 B alleles, *Nat Commun*, 5 (2014) 4757.
- 584 [21] L.K. Teh, M. Selvaraj, Z. Bannur, M.I. Ismail, H. Rafia, W.C. Law, S. Sapuan, S. Puvanarajah,  
585 P.S. Ali, M.Z. Salleh, Coupling Genotyping and Computational Modeling in Prediction of Anti-  
586 epileptic Drugs that cause Stevens Johnson Syndrome and Toxic Epidermal Necrolysis for Carrier of  
587 HLA-B\*15:02, *J Pharm Pharm Sci*, 19 (2016) 147-160.
- 588 [22] N. Hirayama, Docking simulations between drugs and HLA molecules associated with  
589 idiosyncratic drug toxicity, *Drug Metab Pharmacok*, 32 (2017) 31-39.
- 590 [23] P. Schotland, N. Bojunga, A. Zien, M.N. Trame, L.J. Lesko, Improving drug safety with a  
591 systems pharmacology approach, *Eur J Pharm Sci*, 94 (2016) 84-92.



- 592 [24] H. Isogai, H. Miyadera, M. Ueta, C. Sotozono, S. Kinoshita, K. Tokunaga, N. Hirayama, In  
593 Silico Risk Assessment of HLA-A\*02:06-Associated Stevens-Johnson Syndrome and Toxic  
594 Epidermal Necrolysis Caused by Cold Medicine Ingredients, *J Toxicol*, 2013 (2013) 514068.
- 595 [25] C. Yang, C.C. Wang, S.L. Zhang, J. Huang, P. Zhou, Structural and energetic insights into the  
596 intermolecular interaction among human leukocyte antigens, clinical hypersensitive drugs and  
597 antigenic peptides, *Mol Simulat*, 41 (2015) 741-751.
- 598 [26] Z. Zeng, A.R. Castano, B.W. Segelke, E.A. Stura, P.A. Peterson, I.A. Wilson, Crystal structure  
599 of mouse CD1: An MHC-like fold with a large hydrophobic binding groove, *Science*, 277 (1997) 339-  
600 345.
- 601 [27] T.E. Johansen, K. McCullough, B. Catipovic, X.M. Su, M. Amzel, J.P. Schneck, Peptide binding  
602 to MHC class I is determined by individual pockets in the binding groove, *Scand J Immunol*, 46  
603 (1997) 137-146.
- 604 [28] M.A. Saper, P.J. Bjorkman, D.C. Wiley, Refined structure of the human histocompatibility  
605 antigen HLA-A2 at 2.6 Å resolution, *J Mol Biol*, 219 (1991) 277-319.
- 606 [29] J. Sidney, B. Peters, N. Frahm, C. Brander, A. Sette, HLA class I supertypes: a revised and  
607 updated classification, *BMC Immunol*, 9 (2008) 1.
- 608 [30] Schrodinger, LLC, The PyMOL Molecular Graphics System, Version 1.8, 2015.
- 609 [31] A. Grosdidier, V. Zoete, O. Michielin, SwissDock, a protein-small molecule docking web service  
610 based on EADock DSS, *Nucleic Acids Res*, 39 (2011) W270-277.
- 611 [32] A. Grosdidier, V. Zoete, O. Michielin, Fast docking using the CHARMM force field with  
612 EADock DSS, *J Comput Chem*, 32 (2011) 2149-2159.
- 613 [33] S.A. Combs, S.L. Deluca, S.H. Deluca, G.H. Lemmon, D.P. Nannemann, E.D. Nguyen, J.R.  
614 Willis, J.H. Sheehan, J. Meiler, Small-molecule ligand docking into comparative models with Rosetta,  
615 *Nat Protoc*, 8 (2013) 1277-1298.
- 616 [34] S. Lyskov, F.C. Chou, S.O. Conchuir, B.S. Der, K. Drew, D. Kuroda, J. Xu, B.D. Weitzner, P.D.  
617 Renfrew, P. Sripakdeevong, B. Borgo, J.J. Havranek, B. Kuhlman, T. Kortemme, R. Bonneau, J.J.  
618 Gray, R. Das, Serverification of molecular modeling applications: the Rosetta Online Server that  
619 Includes Everyone (ROSIE), *PLoS One*, 8 (2013) e63906.
- 620 [35] O. Trott, A.J. Olson, AutoDock Vina: improving the speed and accuracy of docking with a new  
621 scoring function, efficient optimization, and multithreading, *J Comput Chem*, 31 (2010) 455-461.
- 622 [36] P.A. Ravindranath, S. Forli, D.S. Goodsell, A.J. Olson, M.F. Sanner, AutoDockFR: Advances in  
623 Protein-Ligand Docking with Explicitly Specified Binding Site Flexibility, *PLoS Comput Biol*, 11  
624 (2015) e1004586.
- 625 [37] S. Mallal, D. Nolan, C. Witt, G. Masel, A.M. Martin, C. Moore, D. Sayer, A. Castley, C.  
626 Mamotte, D. Maxwell, I. James, F.T. Christiansen, Association between presence of HLA-B\*5701,  
627 HLA-DR7, and HLA-DQ3 and hypersensitivity to HIV-1 reverse-transcriptase inhibitor abacavir,  
628 *Lancet*, 359 (2002) 727-732.
- 629 [38] N. Berka, J.M. Gill, A. Liacini, T. O'Bryan, F.M. Khan, Human leukocyte antigen (HLA) and  
630 pharmacogenetics: screening for HLA-B\*57:01 among human immunodeficiency virus-positive  
631 patients from southern Alberta, *Hum Immunol*, 73 (2012) 164-167.
- 632 [39] D. Chessman, L. Kostenko, T. Lethborg, A.W. Purcell, N.A. Williamson, Z. Chen, L. Kjer-  
633 Nielsen, N.A. Mifsud, B.D. Tait, R. Holdsworth, C.A. Almeida, D. Nolan, W.A. Macdonald, J.K.  
634 Archbold, A.D. Kellerher, D. Marriott, S. Mallal, M. Bharadwaj, J. Rossjohn, J. McCluskey, Human  
635 leukocyte antigen class I-restricted activation of CD8+ T cells provides the immunogenetic basis of a  
636 systemic drug hypersensitivity, *Immunity*, 28 (2008) 822-832.
- 637 [40] D.A. Ostrov, B.J. Grant, Y.A. Pompeu, J. Sidney, M. Harndahl, S. Southwood, C. Oseroff, S. Lu,  
638 J. Jakoncic, C.A. de Oliveira, L. Yang, H. Mei, L. Shi, J. Shabanowitz, A.M. English, A. Wriston, A.  
639 Lucas, E. Phillips, S. Mallal, H.M. Grey, A. Sette, D.F. Hunt, S. Buus, B. Peters, Drug  
640 hypersensitivity caused by alteration of the MHC-presented self-peptide repertoire, *Proc Natl Acad  
641 Sci U S A*, 109 (2012) 9959-9964.
- 642 [41] K.D. White, S. Gaudieri, E.J. Phillips, Chapter 21 - HLA and the Pharmacogenomics of Drug  
643 Hypersensitivity A2 - Padmanabhan, Sandosh, *Handbook of Pharmacogenomics and Stratified  
644 Medicine*, Academic Press, San Diego, 2014, pp. 437-465.
- 645 [42] J.D. Thompson, T.J. Gibson, F. Plewniak, F. Jeanmougin, D.G. Higgins, The CLUSTAL\_X  
646 windows interface: flexible strategies for multiple sequence alignment aided by quality analysis tools,  
647 *Nucleic Acids Res*, 25 (1997) 4876-4882.
- 648 [43] A. Sali, T.L. Blundell, Comparative protein modelling by satisfaction of spatial restraints, *J Mol  
649 Biol*, 234 (1993) 779-815.

- 650 [44] G.B. Stewart-Jones, G. Gillespie, I.M. Overton, R. Kaul, P. Roche, A.J. McMichael, S. Rowland-  
651 Jones, E.Y. Jones, Structures of three HIV-1 HLA-B\*5703-peptide complexes and identification of  
652 related HLAs potentially associated with long-term nonprogression, *J Immunol*, 175 (2005) 2459-  
653 2468.
- 654 [45] Y. Yagita, N. Kuse, K. Kuroki, H. Gatanaga, J.M. Carlson, T. Chikata, Z.L. Brumme, H.  
655 Murakoshi, T. Akahoshi, N. Pfeifer, S. Mallal, M. John, T. Ose, H. Matsubara, R. Kanda, Y.  
656 Fukunaga, K. Honda, Y. Kawashima, Y. Ariumi, S. Oka, K. Maenaka, M. Takiguchi, Distinct HIV-1  
657 escape patterns selected by cytotoxic T cells with identical epitope specificity, *J Virol*, 87 (2013)  
658 2253-2263.
- 659 [46] X. Li, P.A. Lamothe, R. Ng, S. Xu, M. Teng, B.D. Walker, J.H. Wang, Crystal structure of HLA-  
660 B\*5801, a protective HLA allele for HIV-1 infection, *Protein Cell*, 7 (2016) 761-765.
- 661 [47] H.N. Klooverpris, D.K. Cole, A. Fuller, J. Carlson, K. Beck, A.J. Schauenburg, P.J. Rizkallah, S.  
662 Buus, A.K. Sewell, P. Goulder, A molecular switch in immunodominant HIV-1-specific CD8 T-cell  
663 epitopes shapes differential HLA-restricted escape, *Retrovirology*, 12 (2015) 20.
- 664 [48] Y. Sato, H. Fujita, A. Yoshikawa, M. Yamashita, A. Yamagata, S.E. Kaiser, K. Iwai, S. Fukai,  
665 Specific recognition of linear ubiquitin chains by the Npl4 zinc finger (NZF) domain of the HOIL-1L  
666 subunit of the linear ubiquitin chain assembly complex, *Proc Natl Acad Sci U S A*, 108 (2011) 20520-  
667 20525.
- 668 [49] G. Roder, T. Blicher, S. Justesen, B. Johannesen, O. Kristensen, J. Kastrup, S. Buus, M. Gajhede,  
669 Crystal structures of two peptide-HLA-B\*1501 complexes; structural characterization of the HLA-  
670 B62 supertype, *Acta Crystallogr D Biol Crystallogr*, 62 (2006) 1300-1310.
- 671 [50] G. Vriend, Prepare PDB file for docking programs, 2008.
- 672 [51] M.F. Sanner, Python: a programming language for software integration and development, *J Mol*  
673 *Graph Model*, 17 (1999) 57-61.
- 674 [52] M.F. Sanner, A.J. Olson, J.C. Spehner, Reduced surface: an efficient way to compute molecular  
675 surfaces, *Biopolymers*, 38 (1996) 305-320.
- 676 [53] W.J. Pichler, Drug hypersensitivity, Basel ; Karger, 2007.2007.
- 677 [54] A. Bordogna, A. Pandini, L. Bonati, Predicting the accuracy of protein-ligand docking on  
678 homology models, *J Comput Chem*, 32 (2011) 81-98.
- 679 [55] H. Fan, J.J. Irwin, B.M. Webb, G. Klebe, B.K. Shoichet, A. Sali, Molecular docking screens  
680 using comparative models of proteins, *J Chem Inf Model*, 49 (2009) 2512-2527.
- 681 [56] P. Ferrara, E. Jacoby, Evaluation of the utility of homology models in high throughput docking, *J*  
682 *Mol Model*, 13 (2007) 897-905.
- 683 [57] A. Hillisch, L.F. Pineda, R. Hilgenfeld, Utility of homology models in the drug discovery  
684 process, *Drug Discov Today*, 9 (2004) 659-669.
- 685 [58] L. Yang, J. Chen, L. He, Harvesting candidate genes responsible for serious adverse drug  
686 reactions from a chemical-protein interactome, *PLoS Comput Biol*, 5 (2009) e1000441.
- 687 [59] S.F. Altschul, W. Gish, W. Miller, E.W. Myers, D.J. Lipman, Basic local alignment search tool, *J*  
688 *Mol Biol*, 215 (1990) 403-410.

## 689 **Supporting information**

- 690 **S1 Table. Percentage sequence identity between models and templates.** Table to show the  
691 percentage sequence identity calculated using BLAST-P [59] for each of the template sequences  
692 compared to the model sequences.
- 693 **S1 Fig. Crystal structure of B\*57:03 aligned to modelled structure of B\*57:03.** Crystal structure  
694 of B\*57:03 (green) shown aligned with models created using one template (blue) and two templates  
695 (pink). Also shown with the known binding position of Abacavir (red). Looking at Tyr116 shown



696 highlighted as sticks, it can be seen that the B\*57:03 model created using one template shows a  
697 different conformation than expected by the known structure.

698 **S2 Fig. Ligplot plots show the interactions between Abacavir and B\*57:01.** (a) Known binding  
699 position of Abacavir in complex with B\*57:01 (3VRI). (b) B5701\_s using AutoDockFR, pose 3  
700 showing lowest RMSD (2.254 Å). (c) B5701\_s using AutoDockFR, pose 4 showing highest RMSD  
701 (7.639 Å). Similar interactions with key residues can be seen between all poses (circled). Dashed lines  
702 show Hydrogen bonds (with length), spoked arcs show hydrophobic bonds. Created using Ligplot  
703 [56].

704 **S3 Fig. Comparison of docking poses using crystal and modelled structures of B\*57:01 and**  
705 **B\*57:03.** (a) Known structure of B\*57:01 (B5701\_s) showing all docking poses for Abacavir using  
706 SwissDock; (b) Modelled structure of B\*57:01 risk allele (B5701\_m) showing all docking poses for  
707 Abacavir using SwissDock; (c); B\*57:03 known structure (B5703\_s) showing all docking poses for  
708 Abacavir using SwissDock; (d) modelled structure of B\*57:03 (B5703\_m2) showing all docking  
709 poses for Abacavir using SwissDock. Known binding position of Abacavir from 3VRI shown as red  
710 mesh.

711 **S4 Fig. Comparison of RMSDs for docking poses using crystal and modelled structures of**  
712 **B\*57:01 and B\*57:03.** Boxplot to compare the RMSDs for poses compared to the known binding  
713 position of Abacavir, for both the crystal structures and models of B\*57:01 and B\*57:03 using  
714 SwissDock.

715 **S5 Fig. Docking Carbamazepine with control alleles using SwissDock.** SwissDock poses for  
716 Carbamazepine docked with (a) B\*15:01 control allele (B1501\_s), (b) B\*07:02 control allele  
717 (B0702\_s) and (c) A\*01:01 control allele (A0101\_s). Residue at 116 shown in red, with other D-  
718 pocket residues shown in blue.

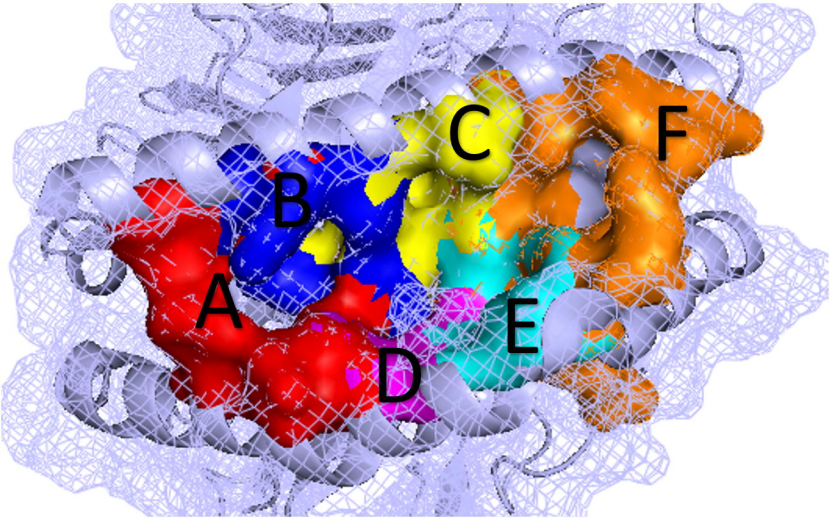

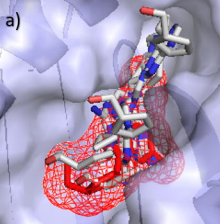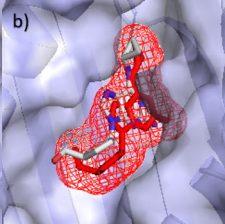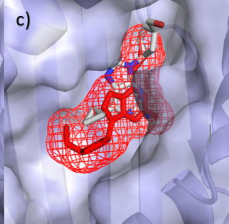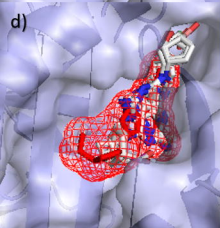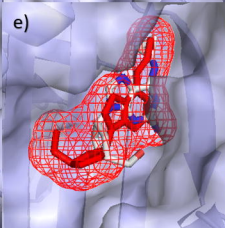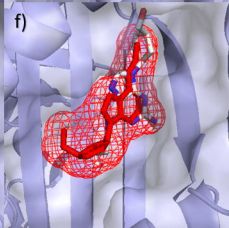

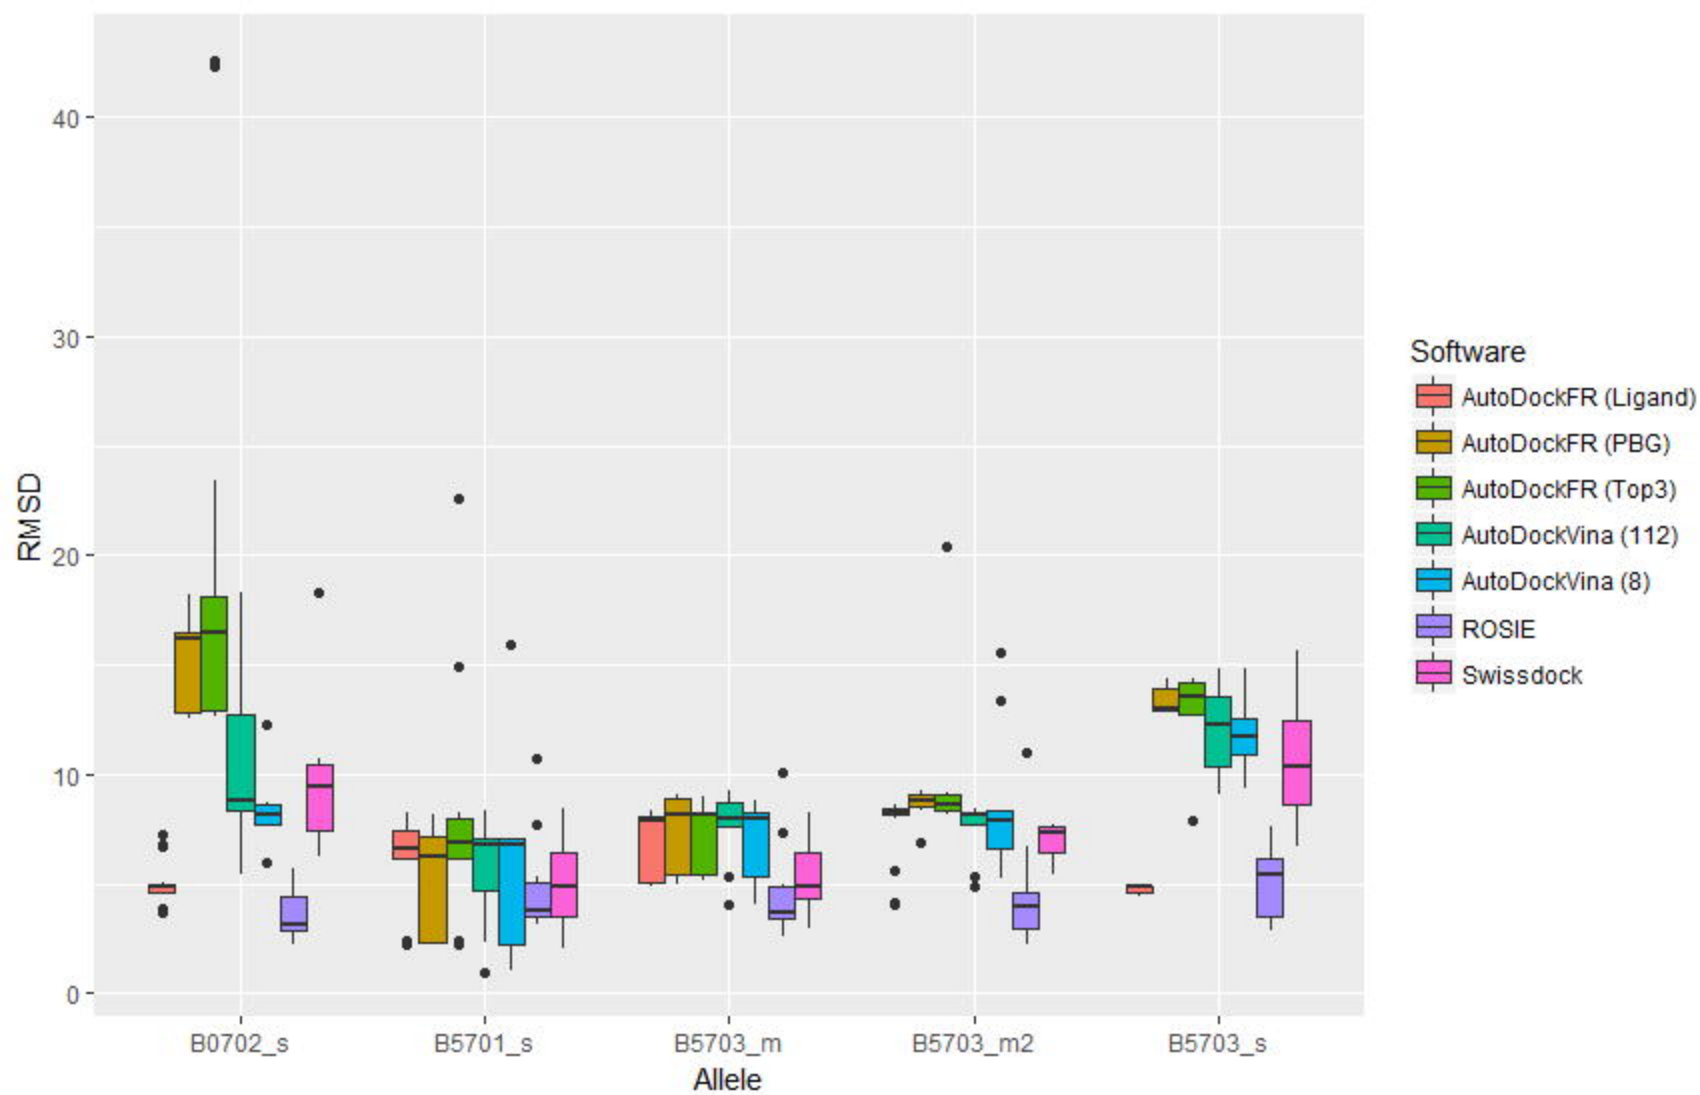

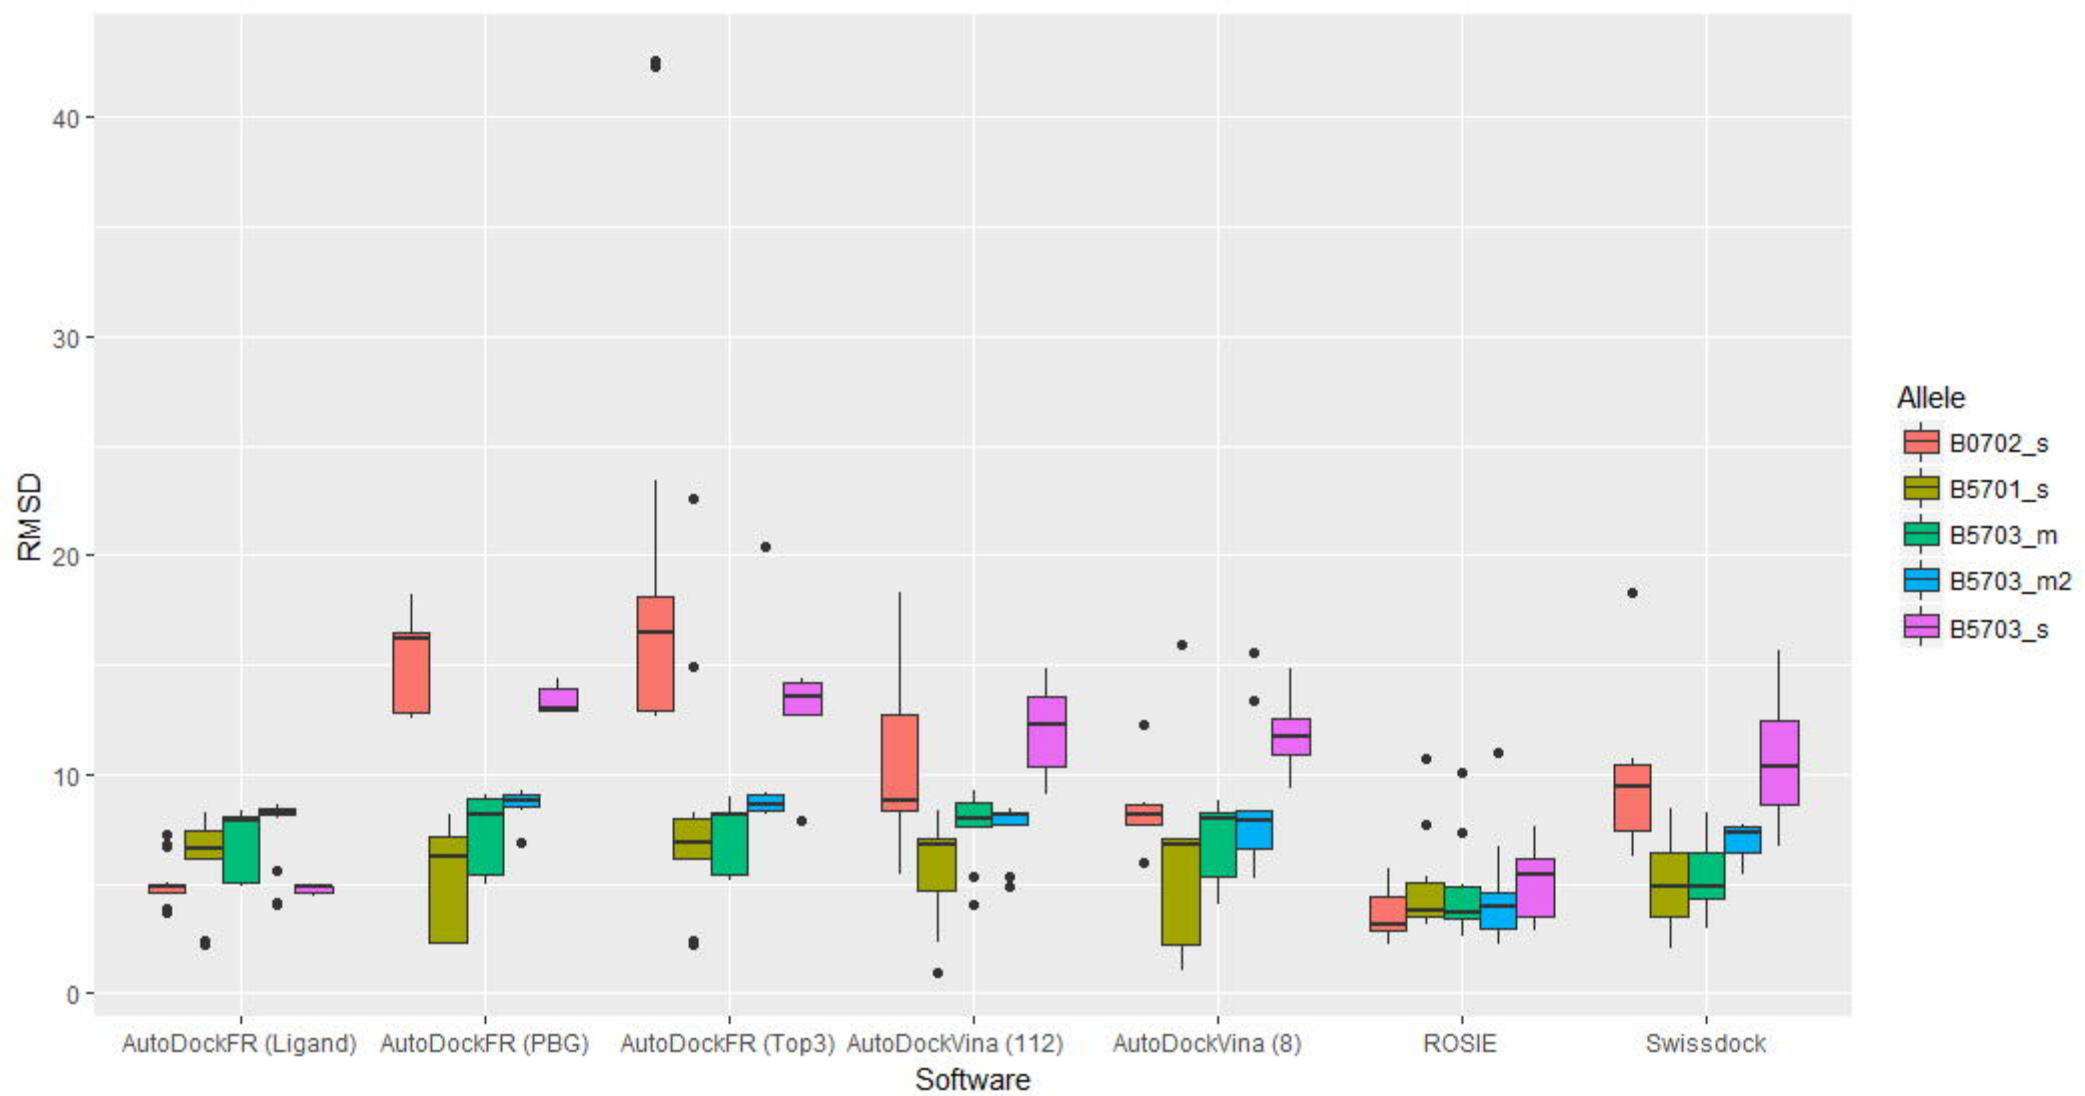

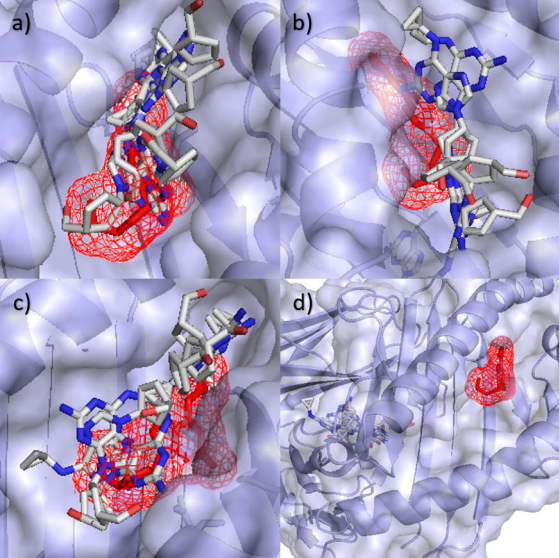

a)

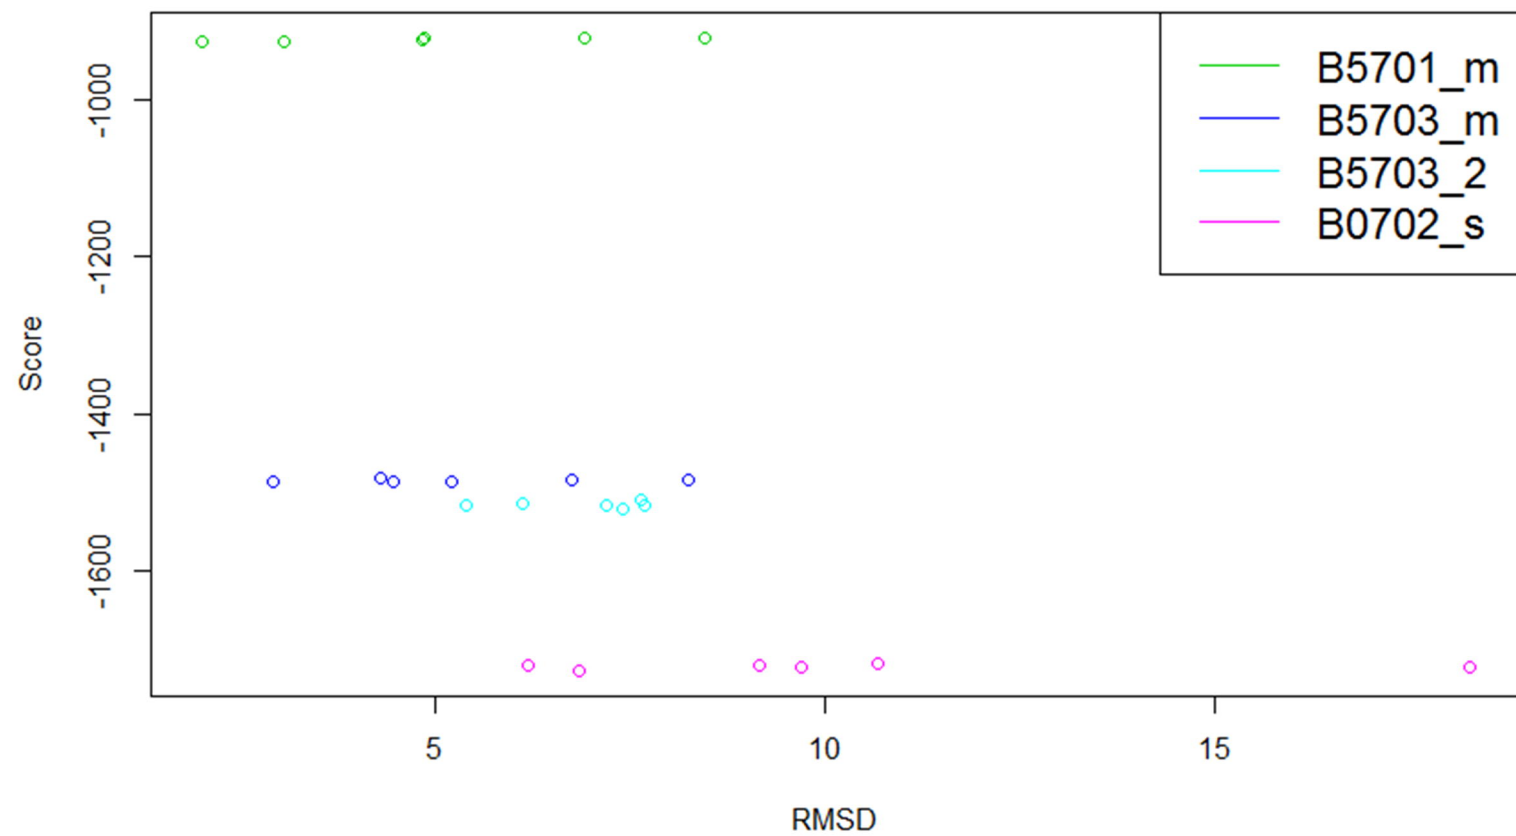

b)

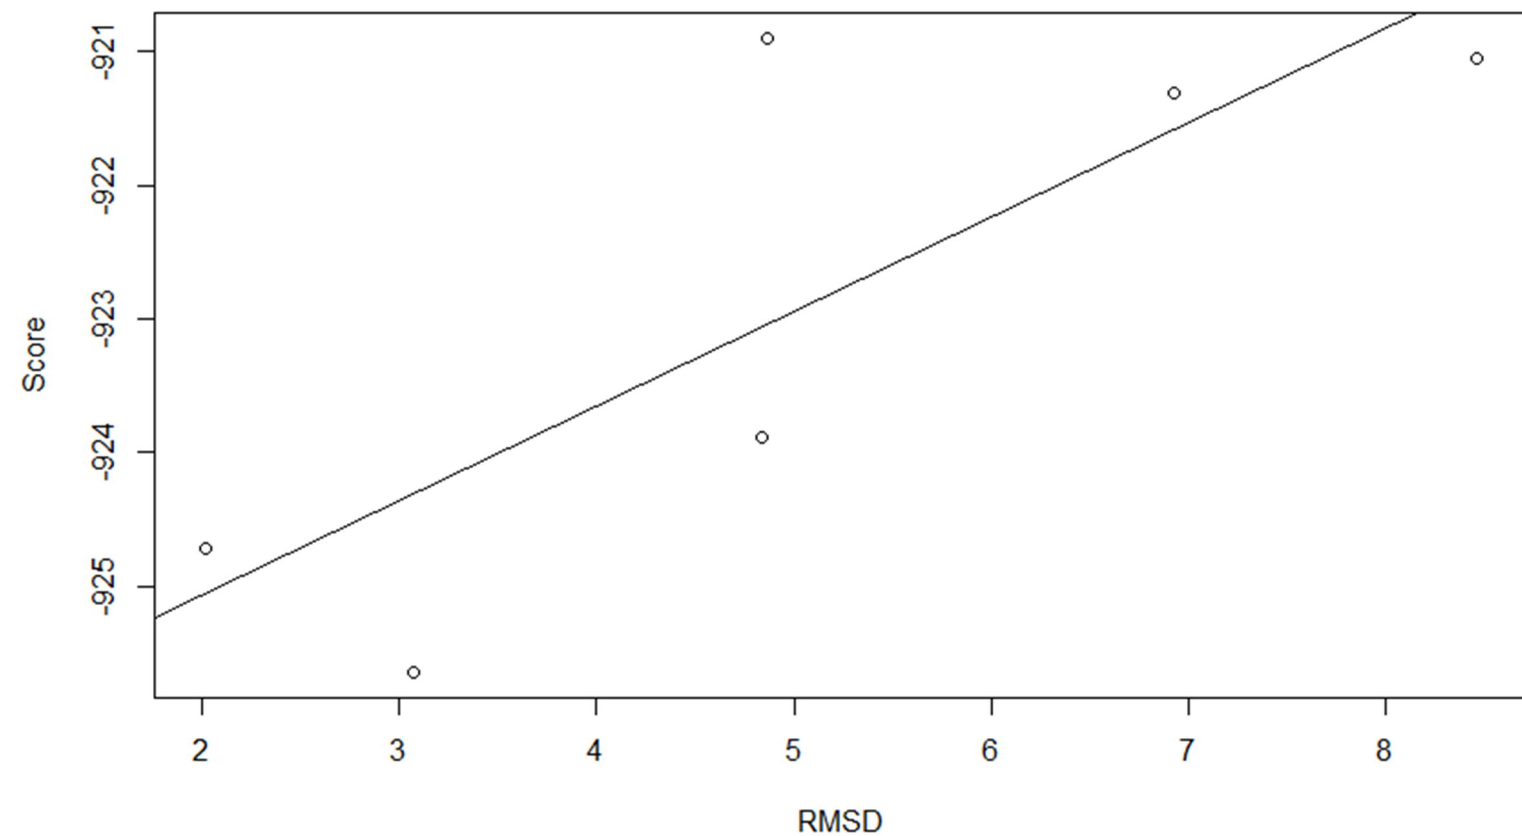

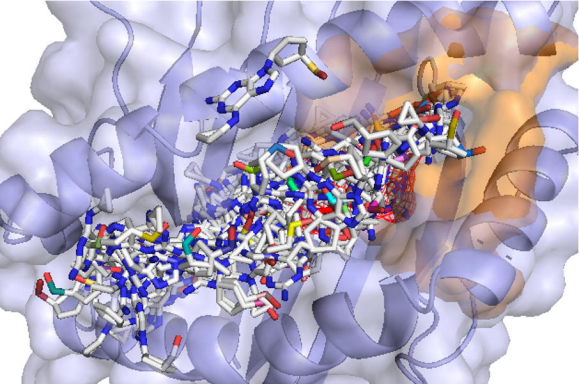



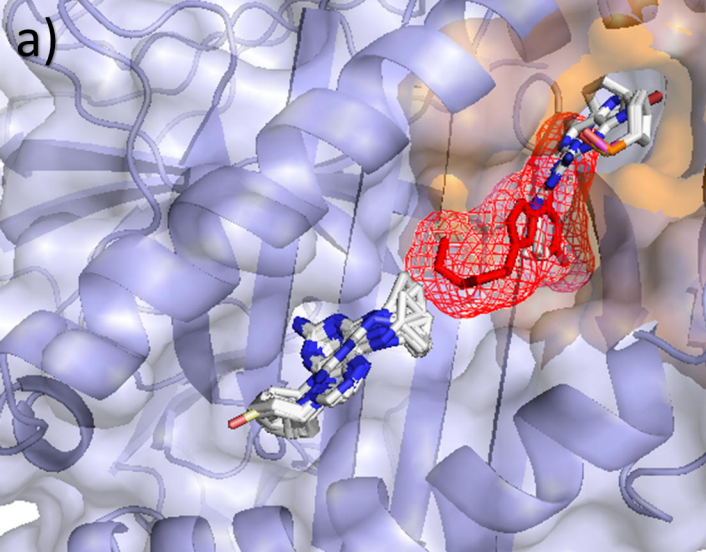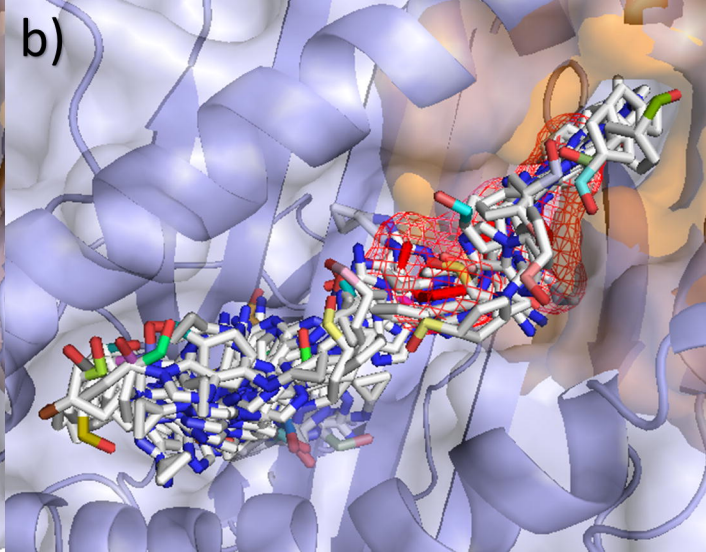

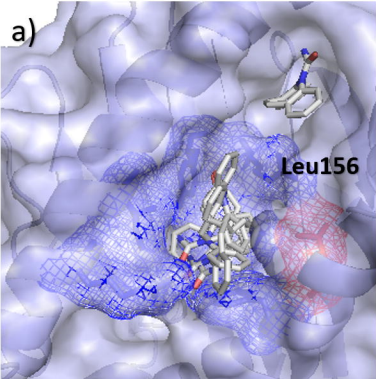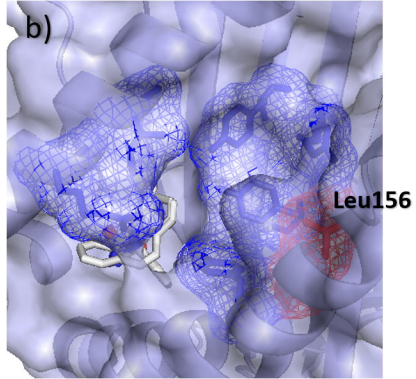

Source: http://biorxiv.org/content/10.1101/296574v1.full.pdf
